# Supplementary material
Source: PubMed Central journal article supplement (PMC5915195)
Supplement: EHP1115.s001.acco.pdf [file EHP1115.s001.acco.pdf]

**Note to readers with disabilities:** *EHP* strives to ensure that all journal content is accessible to all readers. However, some figures and Supplemental Material published in *EHP* articles may not conform to [508 standards](#) due to the complexity of the information being presented. If you need assistance accessing journal content, please contact [ehp508@niehs.nih.gov](mailto:ehp508@niehs.nih.gov). Our staff will work with you to assess and meet your accessibility needs within 3 working days.

### **Supplemental Material**

#### **Long-Term Air Pollution Exposure and Amyotrophic Lateral Sclerosis in Netherlands: A Population-based Case-control Study**

Meinie Seelen, Rosario A. Toro Campos, Jan H. Veldink, Anne E. Visser, Gerard Hoek, Bert Brunekreef, Anneke J. van der Kooi, Marianne de Visser, Joost Raaphorst, Leonard H. van den Berg, and Roel C.H. Vermeulen

#### **Table of Contents**

**Table S1.** Demographic characteristics of the original patient cohort compared to the final cohort, and of the eliminated patients by post hoc matching procedure

**Table S2.** Demographic characteristics of the original cohort compared to the final cohort, and of the eliminated controls by post hoc matching procedure

**Table S3.** Comparing the main analyses of the imputed dataset with the non-imputed dataset

**Table S4.** Pearson correlations between exposure to air pollutant concentrations at participant addresses

**Table S5.** Association between ALS risk and exposure to air pollutants for different time periods: last 5 years and last 1 year before symptom onset.

**Table S6.** Subgroup analyses taking out the exposure data of the last year and the last 5 years before symptom onset, to exclude a possible effect of incipient ALS

**Table S7.** Subgroup analyses taking out the participants who moved in the last year and last 5 years before symptom onset

**Table S8.** Subgroup analysis of non-smokers and current smokers for the association between ALS and exposure to air pollution

**Table S9.** Subgroup analyses for site of onset for the association between ALS and exposure to air pollution

**Figure S1.** Diagram of the matching procedure

**Figure S2.** Continuous analyses using splines of each pollutant separately

**Table S1.** Demographic characteristics of the original patient cohort compared to the final cohort, and of the eliminated patients by post hoc matching procedure

| Characteristics                                                 | ALS patients |            |       | p Value |
|-----------------------------------------------------------------|--------------|------------|-------|---------|
|                                                                 | original     | eliminated | final |         |
| Male, %                                                         | 59.7         | 54.5       | 61.1  | 0.53    |
| Age, y, median                                                  | 63.5         | 63.8       | 63.5  | 0.91    |
| Education, %                                                    |              |            |       |         |
| Elementary school                                               | 8.7          | 11.5       | 8.1   |         |
| Secondary school/High school                                    | 65.6         | 65.0       | 65.8  | 0.87    |
| College/University                                              | 25.7         | 23.5       | 26.2  |         |
| Area SES, median                                                | 20.0         | 19.8       | 20.0  | 0.46    |
| Urbanization degree, addresses/km <sup>2</sup> , % <sup>a</sup> |              |            |       |         |
| Very high (≥2500)                                               | 13.2         | 13.1       | 13.2  |         |
| High (1500 - <2500)                                             | 27.2         | 30.2       | 26.6  |         |
| Moderately (1000 - <1500)                                       | 24.3         | 18.1       | 25.6  | 0.77    |
| Low (500 - <1000)                                               | 26.0         | 22.6       | 26.7  |         |
| Very low (<500)                                                 | 9.3          | 16.1       | 7.9   |         |

Abbreviations: ALS = amyotrophic lateral sclerosis; SES = socioeconomic status. <sup>a</sup> Urbanization degree is based on district level.

P values were calculated for the comparison of the original and the final cohort of patients.

**Table S2.** Demographic characteristics of the original cohort compared to the final cohort, and of the eliminated controls by post hoc matching procedure

| <b>Characteristics</b>                                          | <b>Controls</b> |                   |              | <b>p Value</b> |
|-----------------------------------------------------------------|-----------------|-------------------|--------------|----------------|
|                                                                 | <b>original</b> | <b>eliminated</b> | <b>final</b> |                |
| Male, %                                                         | 62.0            | 62.9              | 61.3         | 0.66           |
| Age, y, median                                                  | 63.5            | 63.6              | 63.5         | 0.83           |
| Education, %                                                    |                 |                   |              |                |
| Elementary school                                               | 6.3             | 5.9               | 7.1          |                |
| Secondary school/High school                                    | 65.1            | 66.4              | 63.9         | 0.85           |
| College/University                                              | 28.6            | 27.6              | 28.9         |                |
| Area SES, median                                                | 20.0            | 20.0              | 20.6         | 0.50           |
| Urbanization degree, addresses/km <sup>2</sup> , % <sup>a</sup> |                 |                   |              |                |
| Very high (≥2500)                                               | 8.2             | 8.7               | 9.1          |                |
| High (1500 - <2500)                                             | 26.4            | 25.3              | 25.7         |                |
| Moderately (1000 - <1500)                                       | 23.2            | 22.7              | 24.8         | 0.93           |
| Low (500 - <1000)                                               | 30.2            | 31.6              | 28.4         |                |
| Very low (<500)                                                 | 12.1            | 11.7              | 12.1         |                |

Abbreviations: ALS = amyotrophic lateral sclerosis; SES = socioeconomic status. <sup>a</sup> Urbanization degree is based on district level.

P values were calculated for the comparison of the original and the final cohort of controls.

**Table S3.** Comparing the main analyses of the imputed dataset with the non-imputed dataset

| Air pollutant                             | Imputed dataset          |                             | Non-imputed dataset      |                             |
|-------------------------------------------|--------------------------|-----------------------------|--------------------------|-----------------------------|
|                                           | OR (95% CI) <sup>a</sup> | <i>p</i> Value <sup>b</sup> | OR (95% CI) <sup>a</sup> | <i>p</i> Value <sup>b</sup> |
| <b><i>PM</i><sub>10</sub></b>             |                          |                             |                          |                             |
| Q1                                        | Reference                | 0.006                       | Reference                | 0.02                        |
| Q2                                        | 0.77 (0.59-1.00)         |                             | 0.66 (0.46-0.94)         |                             |
| Q3                                        | 0.83 (0.62-1.10)         |                             | 0.79 (0.55-1.15)         |                             |
| Q4                                        | 1.29 (0.97-1.72)         |                             | 1.14 (0.78-1.66)         |                             |
| <b><i>PM</i><sub>coarse</sub></b>         |                          |                             |                          |                             |
| Q1                                        | Reference                | 0.01                        | Reference                | 0.03                        |
| Q2                                        | 0.82 (0.64-1.05)         |                             | 0.96 (0.69-1.33)         |                             |
| Q3                                        | 0.95 (0.74-1.24)         |                             | 1.04 (0.75-1.47)         |                             |
| Q4                                        | 1.24 (0.95-1.61)         |                             | 1.31 (0.93-1.84)         |                             |
| <b><i>PM</i><sub>2.5</sub></b>            |                          |                             |                          |                             |
| Q1                                        | Reference                | 0.10                        | Reference                | 0.23                        |
| Q2                                        | 0.98 (0.75-1.28)         |                             | 0.96 (0.67-1.37)         |                             |
| Q3                                        | 0.85 (0.62-1.16)         |                             | 0.77 (0.52-1.15)         |                             |
| Q4                                        | 1.35 (0.97-1.88)         |                             | 1.26 (0.83-1.91)         |                             |
| <b><i>PM</i><sub>2.5</sub> absorbance</b> |                          |                             |                          |                             |
| Q1                                        | Reference                | <0.001                      | Reference                | 0.002                       |
| Q2                                        | 1.14 (0.88-1.47)         |                             | 1.17 (0.85-1.61)         |                             |
| Q3                                        | 1.12 (0.86-1.47)         |                             | 1.20 (0.85-1.68)         |                             |
| Q4                                        | 1.67 (1.27-2.18)         |                             | 1.63 (1.16-2.30)         |                             |
| <b><i>NO</i><sub>2</sub></b>              |                          |                             |                          |                             |
| Q1                                        | Reference                | <0.001                      | Reference                | <0.001                      |
| Q2                                        | 1.38 (1.09-1.76)         |                             | 1.47 (1.08-2.00)         |                             |
| Q3                                        | 1.25 (0.97-1.63)         |                             | 1.50 (1.08-2.09)         |                             |
| Q4                                        | 1.74 (1.32-2.30)         |                             | 1.99 (1.40-2.84)         |                             |
| <b><i>NO</i><sub>x</sub></b>              |                          |                             |                          |                             |
| Q1                                        | Reference                | 0.004                       | Reference                | 0.01                        |
| Q2                                        | 0.98 (0.78-1.24)         |                             | 0.99 (0.73-1.34)         |                             |
| Q3                                        | 1.12 (0.87-1.43)         |                             | 1.28 (0.94-1.76)         |                             |
| Q4                                        | 1.38 (1.07-1.77)         |                             | 1.41 (1.02-1.94)         |                             |

<sup>a</sup> Model 1 was used for the comparison; this multivariate model is adjusted for sex, age, educational level, current smoking, current alcohol consumption, body mass index and socioeconomic status. <sup>b</sup> *P* value was calculated for linear trend.

**Table S4.** Pearson correlations between exposure to air pollutant concentrations at participant addresses

| <b>Air pollutant</b>         | <b>PM<sub>10</sub></b> | <b>PM<sub>coarse</sub></b> | <b>PM<sub>2.5</sub></b> | <b>PM<sub>2.5</sub> absorbance</b> | <b>NO<sub>2</sub></b> | <b>NO<sub>x</sub></b> |
|------------------------------|------------------------|----------------------------|-------------------------|------------------------------------|-----------------------|-----------------------|
| PM <sub>10</sub>             | 1                      |                            |                         |                                    |                       |                       |
| PM <sub>coarse</sub>         | 0.828                  | 1                          |                         |                                    |                       |                       |
| PM <sub>2.5</sub>            | 0.645                  | 0.497                      | 1                       |                                    |                       |                       |
| PM <sub>2.5</sub> absorbance | 0.779                  | 0.661                      | 0.667                   | 1                                  |                       |                       |
| NO <sub>2</sub>              | 0.686                  | 0.694                      | 0.390                   | 0.818                              | 1                     |                       |
| NO <sub>x</sub>              | 0.723                  | 0.716                      | 0.460                   | 0.813                              | 0.835                 | 1                     |

All correlations are significant at the 0.01 level.

**Table S5.** Association between ALS risk and exposure to air pollutants for different time periods: last 5 years and last 1 year before symptom onset

| Air pollutant                             | Total population         |                      | Last 5 years before onset |                      | Last year before onset   |                      |
|-------------------------------------------|--------------------------|----------------------|---------------------------|----------------------|--------------------------|----------------------|
|                                           | OR (95% CI) <sup>a</sup> | p Value <sup>b</sup> | OR (95% CI) <sup>a</sup>  | p Value <sup>b</sup> | OR (95% CI) <sup>a</sup> | p Value <sup>b</sup> |
| <b><i>PM<sub>10</sub></i></b>             |                          |                      |                           |                      |                          |                      |
| Q1                                        | Reference                | 0.006                | Reference                 | 0.02                 | Reference                | 0.006                |
| Q2                                        | 0.77 (0.59-1.00)         |                      | 0.82 (0.45-1.50)          |                      | 2.58 (0.75-8.84)         |                      |
| Q3                                        | 0.83 (0.62-1.10)         |                      | 1.71 (0.77-3.82)          |                      | 5.60 (0.47-66.3)         |                      |
| Q4                                        | 1.29 (0.97-1.72)         |                      | 3.04 (1.28-7.22)          |                      | 4.94 (1.16-21.1)         |                      |
| <b><i>PM<sub>coarse</sub></i></b>         |                          |                      |                           |                      |                          |                      |
| Q1                                        | Reference                | 0.01                 | Reference                 | 0.04                 | Reference                | 0.03                 |
| Q2                                        | 0.82 (0.64-1.05)         |                      | 0.74 (0.49-1.17)          |                      | 2.01 (1.04-3.88)         |                      |
| Q3                                        | 0.95 (0.74-1.24)         |                      | 1.24 (0.81-1.90)          |                      | 0.78 (0.31-1.95)         |                      |
| Q4                                        | 1.24 (0.95-1.61)         |                      | 1.56 (1.05-2.33)          |                      | 2.17 (1.09-4.31)         |                      |
| <b><i>PM<sub>2.5</sub></i></b>            |                          |                      |                           |                      |                          |                      |
| Q1                                        | Reference                | 0.10                 | Reference                 | 0.03                 | Reference                | 0.20                 |
| Q2                                        | 0.98 (0.75-1.28)         |                      | 1.29 (0.62-.271)          |                      | 3.25 (0.95-11.1)         |                      |
| Q3                                        | 0.85 (0.62-1.16)         |                      | 4.61 (1.32-16.1)          |                      | 0.78 (0.08-8.10)         |                      |
| Q4                                        | 1.35 (0.97-1.88)         |                      | 1.90 (0.57-6.29)          |                      | NA                       |                      |
| <b><i>PM<sub>2.5</sub> absorbance</i></b> |                          |                      |                           |                      |                          |                      |
| Q1                                        | Reference                | <0.001               | Reference                 | 0.01                 | Reference                | 0.001                |
| Q2                                        | 1.14 (0.88-1.47)         |                      | 1.27 (0.96-1.68)          |                      | 1.40 (1.06-1.84)         |                      |
| Q3                                        | 1.12 (0.86-1.47)         |                      | 1.43 (0.95-2.15)          |                      | 1.20 (0.83-1.75)         |                      |
| Q4                                        | 1.67 (1.27-2.18)         |                      | 1.38 (0.98-1.95)          |                      | 1.73 (1.22-2.45)         |                      |
| <b><i>NO<sub>2</sub></i></b>              |                          |                      |                           |                      |                          |                      |
| Q1                                        | Reference                | <0.001               | Reference                 | <0.001               | Reference                | <0.001               |
| Q2                                        | 1.38 (1.09-1.76)         |                      | 1.02 (0.82-1.26)          |                      | 1.15 (0.93-1.42)         |                      |
| Q3                                        | 1.25 (0.97-1.63)         |                      | 1.28 (0.99-1.65)          |                      | 1.37 (1.05-1.80)         |                      |
| Q4                                        | 1.74 (1.32-2.30)         |                      | 1.75 (1.34-2.29)          |                      | 1.71 (1.30-2.26)         |                      |
| <b><i>NO<sub>x</sub></i></b>              |                          |                      |                           |                      |                          |                      |
| Q1                                        | Reference                | 0.004                | Reference                 | <0.001               | Reference                | <0.001               |
| Q2                                        | 0.98 (0.78-1.24)         |                      | 1.00 (0.77-1.29)          |                      | 1.44 (1.10-1.90)         |                      |
| Q3                                        | 1.12 (0.87-1.43)         |                      | 1.72 (1.31-2.26)          |                      | 1.93 (1.41-2.64)         |                      |
| Q4                                        | 1.38 (1.07-1.77)         |                      | 1.45 (1.12-1.89)          |                      | 1.53 (1.14-2.05)         |                      |

<sup>a</sup> Main model 1 was used for the comparison; this confounder model was adjusted for sex, age, educational level, current smoking, current alcohol consumption, body mass index and socioeconomic status. <sup>b</sup> P value was calculated for linear trend based on median values.

**Table S6.** Subgroup analyses taking out the exposure data of the last year and the last 5 years before symptom onset, to exclude a possible effect of incipient ALS

| Air pollutant                             | Total population         |                      | Excluding last year      |                      | Excluding last 5 years   |                      |
|-------------------------------------------|--------------------------|----------------------|--------------------------|----------------------|--------------------------|----------------------|
|                                           | OR (95% CI) <sup>a</sup> | p Value <sup>b</sup> | OR (95% CI) <sup>a</sup> | p Value <sup>b</sup> | OR (95% CI) <sup>a</sup> | p Value <sup>b</sup> |
| <b><i>PM<sub>10</sub></i></b>             |                          |                      |                          |                      |                          |                      |
| Q1                                        | Reference                | 0.006                | Reference                | 0.02                 | Reference                | 0.95                 |
| Q2                                        | 0.77 (0.59-1.00)         |                      | 0.95 (0.71-1.28)         |                      | 1.20 (0.39-3.73)         |                      |
| Q3                                        | 0.83 (0.62-1.10)         |                      | 0.79 (0.58-1.09)         |                      | 0.72 (0.31-1.66)         |                      |
| Q4                                        | 1.29 (0.97-1.72)         |                      | 1.22 (0.89-1.68)         |                      | 0.84 (0.38-1.88)         |                      |
| <b><i>PM<sub>coarse</sub></i></b>         |                          |                      |                          |                      |                          |                      |
| Q1                                        | Reference                | 0.01                 | Reference                | 0.006                | Reference                | 0.81                 |
| Q2                                        | 0.82 (0.64-1.05)         |                      | 0.92 (0.69-1.22)         |                      | 2.17 (0.63-7.51)         |                      |
| Q3                                        | 0.95 (0.74-1.24)         |                      | 0.98 (0.74-1.31)         |                      | 1.70 (0.56-5.19)         |                      |
| Q4                                        | 1.24 (0.95-1.61)         |                      | 1.30 (0.97-1.75)         |                      | 1.63 (0.54-4.94)         |                      |
| <b><i>PM<sub>2.5</sub></i></b>            |                          |                      |                          |                      |                          |                      |
| Q1                                        | Reference                | 0.10                 | Reference                | 0.34                 | Reference                | 0.93                 |
| Q2                                        | 0.98 (0.75-1.28)         |                      | 0.94 (0.69-1.27)         |                      | 0.94 (0.44-1.99)         |                      |
| Q3                                        | 0.85 (0.62-1.16)         |                      | 0.84 (0.60-1.18)         |                      | 1.11 (0.54-2.27)         |                      |
| Q4                                        | 1.35 (0.97-1.88)         |                      | 1.13 (0.80-11.60)        |                      | 1.03 (0.51-2.07)         |                      |
| <b><i>PM<sub>2.5</sub> absorbance</i></b> |                          |                      |                          |                      |                          |                      |
| Q1                                        | Reference                | <0.001               | Reference                | <0.001               | Reference                | 0.06                 |
| Q2                                        | 1.14 (0.88-1.47)         |                      | 0.96 (0.74-1.24)         |                      | 1.04 (0.73-1.50)         |                      |
| Q3                                        | 1.12 (0.86-1.47)         |                      | 1.09 (0.83-1.44)         |                      | 1.00 (0.70-1.43)         |                      |
| Q4                                        | 1.67 (1.27-2.18)         |                      | 1.51 (1.15-1.99)         |                      | 1.24 (0.87-1.78)         |                      |
| <b><i>NO<sub>2</sub></i></b>              |                          |                      |                          |                      |                          |                      |
| Q1                                        | Reference                | <0.001               | Reference                | 0.001                | Reference                | 0.001                |
| Q2                                        | 1.38 (1.09-1.76)         |                      | 1.32 (1.04-1.69)         |                      | 1.25 (0.95-1.63)         |                      |
| Q3                                        | 1.25 (0.97-1.63)         |                      | 1.24 (0.95-1.62)         |                      | 1.10 (0.83-1.46)         |                      |
| Q4                                        | 1.74 (1.32-2.30)         |                      | 1.68 (1.28-2.22)         |                      | 1.63 (1.23-2.16)         |                      |
| <b><i>NO<sub>x</sub></i></b>              |                          |                      |                          |                      |                          |                      |
| Q1                                        | Reference                | 0.004                | Reference                | 0.002                | Reference                | 0.003                |
| Q2                                        | 0.98 (0.78-1.24)         |                      | 0.87 (0.68-1.11)         |                      | 0.97 (0.70-1.34)         |                      |
| Q3                                        | 1.12 (0.87-1.43)         |                      | 1.05 (0.81-1.35)         |                      | 1.07 (0.78-1.47)         |                      |
| Q4                                        | 1.38 (1.07-1.77)         |                      | 1.34 (1.04-1.72)         |                      | 1.35 (0.98-1.85)         |                      |

<sup>a</sup> Main model 1 was used for the comparison; this confounder model was adjusted for sex, age, educational level, current smoking, current alcohol consumption, body mass index and socioeconomic status. <sup>b</sup> P value was calculated for linear trend based on median values.



**Table S7.** Subgroup analyses taking out the participants who moved in the last year and last 5 years before symptom onset

| Air pollutant                      | Total population         |                      | Not moved in the last year <sup>a</sup> |                      | Not moved in the last 5 years <sup>b</sup> |                      |
|------------------------------------|--------------------------|----------------------|-----------------------------------------|----------------------|--------------------------------------------|----------------------|
|                                    | OR (95% CI) <sup>c</sup> | p Value <sup>d</sup> | OR (95% CI) <sup>c</sup>                | p Value <sup>d</sup> | OR (95% CI) <sup>c</sup>                   | p Value <sup>d</sup> |
| <b>PM<sub>10</sub></b>             |                          |                      |                                         |                      |                                            |                      |
| Q1                                 | Reference                | 0.006                | Reference                               | 0.004                | Reference                                  | 0.04                 |
| Q2                                 | 0.77 (0.59-1.00)         |                      | 0.73 (0.56-0.95)                        |                      | 0.69 (0.51-0.94)                           |                      |
| Q3                                 | 0.83 (0.62-1.10)         |                      | 0.85 (0.63-1.14)                        |                      | 0.74 (0.52-1.04)                           |                      |
| Q4                                 | 1.29 (0.97-1.72)         |                      | 1.32 (0.98-1.78)                        |                      | 1.20 (0.85-1.69)                           |                      |
| <b>PM<sub>coarse</sub></b>         |                          |                      |                                         |                      |                                            |                      |
| Q1                                 | Reference                | 0.01                 | Reference                               | 0.006                | Reference                                  | 0.03                 |
| Q2                                 | 0.82 (0.64-1.05)         |                      | 0.77 (0.60-1.00)                        |                      | 0.80 (0.60-1.06)                           |                      |
| Q3                                 | 0.95 (0.74-1.24)         |                      | 0.98 (0.75-1.28)                        |                      | 0.95 (0.70-1.28)                           |                      |
| Q4                                 | 1.24 (0.95-1.61)         |                      | 1.26 (0.96-1.65)                        |                      | 1.24 (0.91-1.68)                           |                      |
| <b>PM<sub>2.5</sub></b>            |                          |                      |                                         |                      |                                            |                      |
| Q1                                 | Reference                | 0.10                 | Reference                               | 0.03                 | Reference                                  | 0.03                 |
| Q2                                 | 0.98 (0.75-1.28)         |                      | 1.01 (0.77-1.33)                        |                      | 0.98 (0.71-1.35)                           |                      |
| Q3                                 | 0.85 (0.62-1.16)         |                      | 0.91 (0.66-1.26)                        |                      | 0.90 (0.62-1.31)                           |                      |
| Q4                                 | 1.35 (0.97-1.88)         |                      | 1.52 (1.08-2.16)                        |                      | 1.58 (1.06-2.38)                           |                      |
| <b>PM<sub>2.5</sub> absorbance</b> |                          |                      |                                         |                      |                                            |                      |
| Q1                                 | Reference                | <0.001               | Reference                               | <0.001               | Reference                                  | 0.002                |
| Q2                                 | 1.14 (0.88-1.47)         |                      | 1.10 (0.84-1.44)                        |                      | 0.92 (0.68-1.25)                           |                      |
| Q3                                 | 1.12 (0.86-1.47)         |                      | 1.10 (0.83-1.47)                        |                      | 1.06 (0.77-1.46)                           |                      |
| Q4                                 | 1.67 (1.27-2.18)         |                      | 1.62 (1.23-2.15)                        |                      | 1.48 (1.08-2.04)                           |                      |
| <b>NO<sub>2</sub></b>              |                          |                      |                                         |                      |                                            |                      |
| Q1                                 | Reference                | <0.001               | Reference                               | 0.001                | Reference                                  | 0.007                |
| Q2                                 | 1.38 (1.09-1.76)         |                      | 1.39 (1.08-1.79)                        |                      | 1.44 (1.09-1.91)                           |                      |
| Q3                                 | 1.25 (0.97-1.63)         |                      | 1.23 (0.94-1.62)                        |                      | 1.39 (1.02-1.90)                           |                      |
| Q4                                 | 1.74 (1.32-2.30)         |                      | 1.76 (1.32-2.34)                        |                      | 1.66 (1.19-2.30)                           |                      |
| <b>NO<sub>x</sub></b>              |                          |                      |                                         |                      |                                            |                      |
| Q1                                 | Reference                | 0.004                | Reference                               | 0.01                 | Reference                                  | 0.06                 |
| Q2                                 | 0.98 (0.78-1.24)         |                      | 0.96 (0.75-1.23)                        |                      | 0.93 (0.71-1.22)                           |                      |
| Q3                                 | 1.12 (0.87-1.43)         |                      | 1.04 (0.81-1.34)                        |                      | 1.04 (0.78-1.39)                           |                      |
| Q4                                 | 1.38 (1.07-1.77)         |                      | 1.32 (1.02-1.71)                        |                      | 1.26 (0.94-1.69)                           |                      |

<sup>a</sup> Participants who did not move in the last year, no. of cases=861, no. of controls=2376. <sup>b</sup> Participants who did not move in the last five years, no. of cases=719, no. of controls=1759. <sup>c</sup> Main model 1 was used for the comparison; this confounder model was adjusted for sex, age, educational level, current smoking, current alcohol consumption, body mass index and socioeconomic status. <sup>d</sup> P value was calculated for linear trend based on median values.

**Table S8.** Subgroup analysis of non-smokers and current smokers for the association between ALS and exposure to air pollution

| Air pollutant                            | Total population         |                      | Current non-smokers <sup>a</sup> |                      | Current smokers <sup>b</sup> |                      |
|------------------------------------------|--------------------------|----------------------|----------------------------------|----------------------|------------------------------|----------------------|
|                                          | OR (95% CI) <sup>c</sup> | p Value <sup>d</sup> | OR (95% CI) <sup>c</sup>         | p Value <sup>d</sup> | OR (95% CI) <sup>c</sup>     | p Value <sup>d</sup> |
| <b><i>PM<sub>10</sub></i></b>            |                          |                      |                                  |                      |                              |                      |
| Q1                                       | Reference                | 0.006                | Reference                        | 0.04                 | Reference                    | 0.88                 |
| Q2                                       | 0.77 (0.59-1.00)         |                      | 0.80 (0.65-0.98)                 |                      | 0.95 (0.58-1.54)             |                      |
| Q3                                       | 0.83 (0.62-1.10)         |                      | 0.86 (0.70-1.06)                 |                      | 0.82 (0.51-1.34)             |                      |
| Q4                                       | 1.29 (0.97-1.72)         |                      | 1.18 (0.98-1.42)                 |                      | 0.97 (0.61-1.53)             |                      |
| <b><i>PM<sub>coarse</sub></i></b>        |                          |                      |                                  |                      |                              |                      |
| Q1                                       | Reference                | 0.01                 | Reference                        | 0.02                 | Reference                    | 0.93                 |
| Q2                                       | 0.82 (0.64-1.05)         |                      | 0.83 (0.67-1.02)                 |                      | 1.02 (0.63-1.67)             |                      |
| Q3                                       | 0.95 (0.74-1.24)         |                      | 0.95 (0.78-1.16)                 |                      | 0.98 (0.61-1.58)             |                      |
| Q4                                       | 1.24 (0.95-1.61)         |                      | 1.17 (0.96-1.41)                 |                      | 0.93 (0.59-1.48)             |                      |
| <b><i>PM<sub>2.5</sub></i></b>           |                          |                      |                                  |                      |                              |                      |
| Q1                                       | Reference                | 0.10                 | Reference                        | 0.44                 | Reference                    | 0.70                 |
| Q2                                       | 0.98 (0.75-1.28)         |                      | 0.99 (0.81-1.22)                 |                      | 0.99 (0.62-1.56)             |                      |
| Q3                                       | 0.85 (0.62-1.16)         |                      | 0.90 (0.72-1.11)                 |                      | 0.68 (0.40-1.13)             |                      |
| Q4                                       | 1.35 (0.97-1.88)         |                      | 1.11 (0.91-1.35)                 |                      | 1.17 (0.76-1.80)             |                      |
| <b><i>PM<sub>2.5</sub>absorbance</i></b> |                          |                      |                                  |                      |                              |                      |
| Q1                                       | Reference                | <0.001               | Reference                        | 0.003                | Reference                    | 0.33                 |
| Q2                                       | 1.14 (0.88-1.47)         |                      | 0.99 (0.80-1.22)                 |                      | 1.58 (0.97-2.57)             |                      |
| Q3                                       | 1.12 (0.86-1.47)         |                      | 1.03 (0.83-1.28)                 |                      | 1.05 (0.62-1.78)             |                      |
| Q4                                       | 1.67 (1.27-2.18)         |                      | 1.30 (1.07-1.59)                 |                      | 1.39 (0.89-2.18)             |                      |
| <b><i>NO<sub>2</sub></i></b>             |                          |                      |                                  |                      |                              |                      |
| Q1                                       | Reference                | <0.001               | Reference                        | 0.005                | Reference                    | 0.57                 |
| Q2                                       | 1.38 (1.09-1.76)         |                      | 1.21 (0.98-1.50)                 |                      | 1.41 (0.87-2.29)             |                      |
| Q3                                       | 1.25 (0.97-1.63)         |                      | 1.16 (0.93-1.43)                 |                      | 1.04 (0.61-1.78)             |                      |
| Q4                                       | 1.74 (1.32-2.30)         |                      | 1.38 (1.12-1.70)                 |                      | 1.26 (0.79-2.00)             |                      |
| <b><i>NO<sub>x</sub></i></b>             |                          |                      |                                  |                      |                              |                      |
| Q1                                       | Reference                | 0.004                | Reference                        | 0.01                 | Reference                    | 0.69                 |
| Q2                                       | 0.98 (0.78-1.24)         |                      | 0.99 (0.80-1.22)                 |                      | 1.01 (0.63-1.63)             |                      |
| Q3                                       | 1.12 (0.87-1.43)         |                      | 1.13 (0.92-1.40)                 |                      | 0.82 (0.50-1.36)             |                      |
| Q4                                       | 1.38 (1.07-1.77)         |                      | 1.24 (1.02-1.52)                 |                      | 1.09 (0.70-1.69)             |                      |

<sup>a</sup> Non-smokers: no. of cases = 763, no. of controls = 2316. <sup>b</sup> Current smokers: no. of cases = 154, no. of controls = 346. <sup>c</sup> Model 1 was used for the comparison; this multivariate model was adjusted for sex, age, educational level, current alcohol consumption, body mass index and socioeconomic status. <sup>d</sup> P value was calculated for linear trend based on median values.

**Table S9.** Subgroup analyses for site of onset for the association between ALS and exposure to air pollution

| Air pollutant                             | Total population         |                      | Bulbar site of onset <sup>a</sup> |                      | Spinal site of onset <sup>b</sup> |                      |
|-------------------------------------------|--------------------------|----------------------|-----------------------------------|----------------------|-----------------------------------|----------------------|
|                                           | OR (95% CI) <sup>c</sup> | p Value <sup>d</sup> | OR (95% CI) <sup>c</sup>          | p Value <sup>d</sup> | OR (95% CI) <sup>c</sup>          | p Value <sup>d</sup> |
| <b><i>PM<sub>10</sub></i></b>             |                          |                      |                                   |                      |                                   |                      |
| Q1                                        | Reference                | 0.006                | Reference                         | 0.10                 | Reference                         | 0.65                 |
| Q2                                        | 0.77 (0.59-1.00)         |                      | 0.77 (0.48-1.23)                  |                      | 0.72 (0.52-1.00)                  |                      |
| Q3                                        | 0.83 (0.62-1.10)         |                      | 0.81 (0.47-1.41)                  |                      | 0.76 (0.52-1.10)                  |                      |
| Q4                                        | 1.29 (0.97-1.72)         |                      | 1.41 (0.76-2.61)                  |                      | 1.00 (0.66-1.51)                  |                      |
| <b><i>PM<sub>coarse</sub></i></b>         |                          |                      |                                   |                      |                                   |                      |
| Q1                                        | Reference                | 0.01                 | Reference                         | 0.14                 | Reference                         | 0.56                 |
| Q2                                        | 0.82 (0.64-1.05)         |                      | 0.86 (0.56-1.33)                  |                      | 0.72 (0.52-0.98)                  |                      |
| Q3                                        | 0.95 (0.74-1.24)         |                      | 1.13 (0.70-1.84)                  |                      | 0.73 (0.52-1.02)                  |                      |
| Q4                                        | 1.24 (0.95-1.61)         |                      | 1.36 (0.79-2.34)                  |                      | 0.94 (0.65-1.36)                  |                      |
| <b><i>PM<sub>2.5</sub></i></b>            |                          |                      |                                   |                      |                                   |                      |
| Q1                                        | Reference                | 0.10                 | Reference                         | 0.60                 | Reference                         | 0.26                 |
| Q2                                        | 0.98 (0.75-1.28)         |                      | 1.05 (0.66-1.67)                  |                      | 0.87 (0.62-1.22)                  |                      |
| Q3                                        | 0.85 (0.62-1.16)         |                      | 0.87 (0.50-1.49)                  |                      | 0.78 (0.53-1.15)                  |                      |
| Q4                                        | 1.35 (0.97-1.88)         |                      | 1.19 (0.67-2.13)                  |                      | 1.28 (0.84-1.93)                  |                      |
| <b><i>PM<sub>2.5</sub> absorbance</i></b> |                          |                      |                                   |                      |                                   |                      |
| Q1                                        | Reference                | <0.001               | Reference                         | 0.004                | Reference                         | 0.09                 |
| Q2                                        | 1.14 (0.88-1.47)         |                      | 1.17 (0.73-1.87)                  |                      | 1.08 (0.79-1.48)                  |                      |
| Q3                                        | 1.12 (0.86-1.47)         |                      | 1.22 (0.72-2.07)                  |                      | 1.02 (0.72-1.47)                  |                      |
| Q4                                        | 1.67 (1.27-2.18)         |                      | 2.07 (1.17-3.68)                  |                      | 1.36 (0.92-2.02)                  |                      |
| <b><i>NO<sub>2</sub></i></b>              |                          |                      |                                   |                      |                                   |                      |
| Q1                                        | Reference                | <0.001               | Reference                         | <0.001               | Reference                         | 0.90                 |
| Q2                                        | 1.38 (1.09-1.76)         |                      | 1.19 (0.76-1.87)                  |                      | 1.33 (0.98-1.18)                  |                      |
| Q3                                        | 1.25 (0.97-1.63)         |                      | 1.77 (1.08-2.93)                  |                      | 0.91 (0.63-1.33)                  |                      |
| Q4                                        | 1.74 (1.32-2.30)         |                      | 2.85 (1.53-5.33)                  |                      | 1.15 (0.74-1.79)                  |                      |
| <b><i>NO<sub>x</sub></i></b>              |                          |                      |                                   |                      |                                   |                      |
| Q1                                        | Reference                | 0.004                | Reference                         | 0.03                 | Reference                         | 0.76                 |
| Q2                                        | 0.98 (0.78-1.24)         |                      | 0.98 (0.63-1.52)                  |                      | 0.90 (0.67-1.21)                  |                      |
| Q3                                        | 1.12 (0.87-1.43)         |                      | 1.51 (0.94-2.42)                  |                      | 0.81 (0.58-1.13)                  |                      |
| Q4                                        | 1.38 (1.07-1.77)         |                      | 1.61 (0.97-2.68)                  |                      | 1.01 (0.70-1.45)                  |                      |

<sup>a</sup> Bulbar site of onset: no. of cases=324, no. of controls = 940. <sup>b</sup> Spinal site of onset: no. of cases=596, no. of controls = 1731. <sup>c</sup> Model 1 was used for the comparison; this multivariate model was adjusted for sex, age, educational level, current smoking, current alcohol consumption, body mass index and socioeconomic status. <sup>d</sup> P value was calculated for linear trend based on median values.

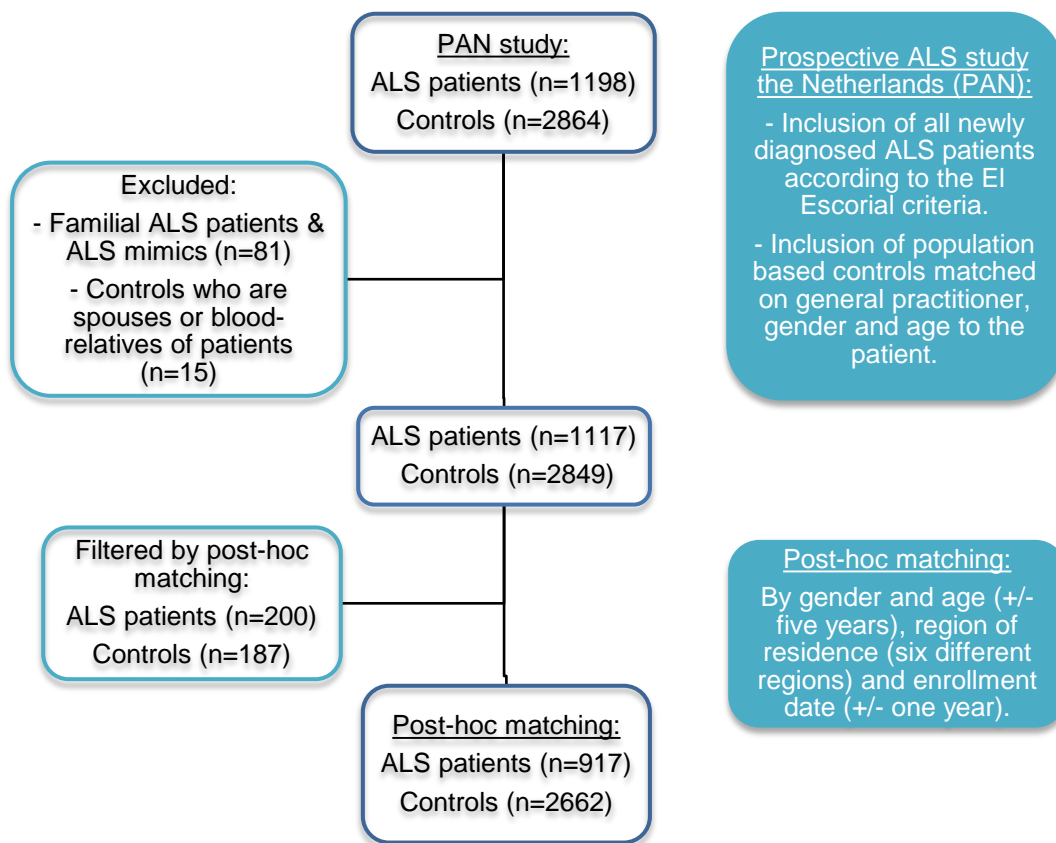

**Figure S1.** Diagram of the matching procedure

ALS patients and controls were included in the PAN study between 2006 and 2013 (original population matching). The population based controls were selected through the register of the general practitioner (GP) of the patient. However, the size of the area covered by one GP (who serves on average ~2000 patients) can be relatively small especially in urban settings, and the inclusion date of controls can be years apart from the date of symptom onset in cases in the original population matching (because of the time lag between date of diagnosis and date of symptom onset in ALS cases), which both can be related to exposure to air pollution. Therefore, we broke the original match (including 1117 cases and 2849 controls) and applied post-hoc matching to the cases by gender and age (+/- five years), region of residence (six different regions) and enrollment date (+/- one year). This resulted in a more uniform distribution of enrollment dates between cases (n=917) and controls (n=2662) and broader spatial matching between cases and controls.

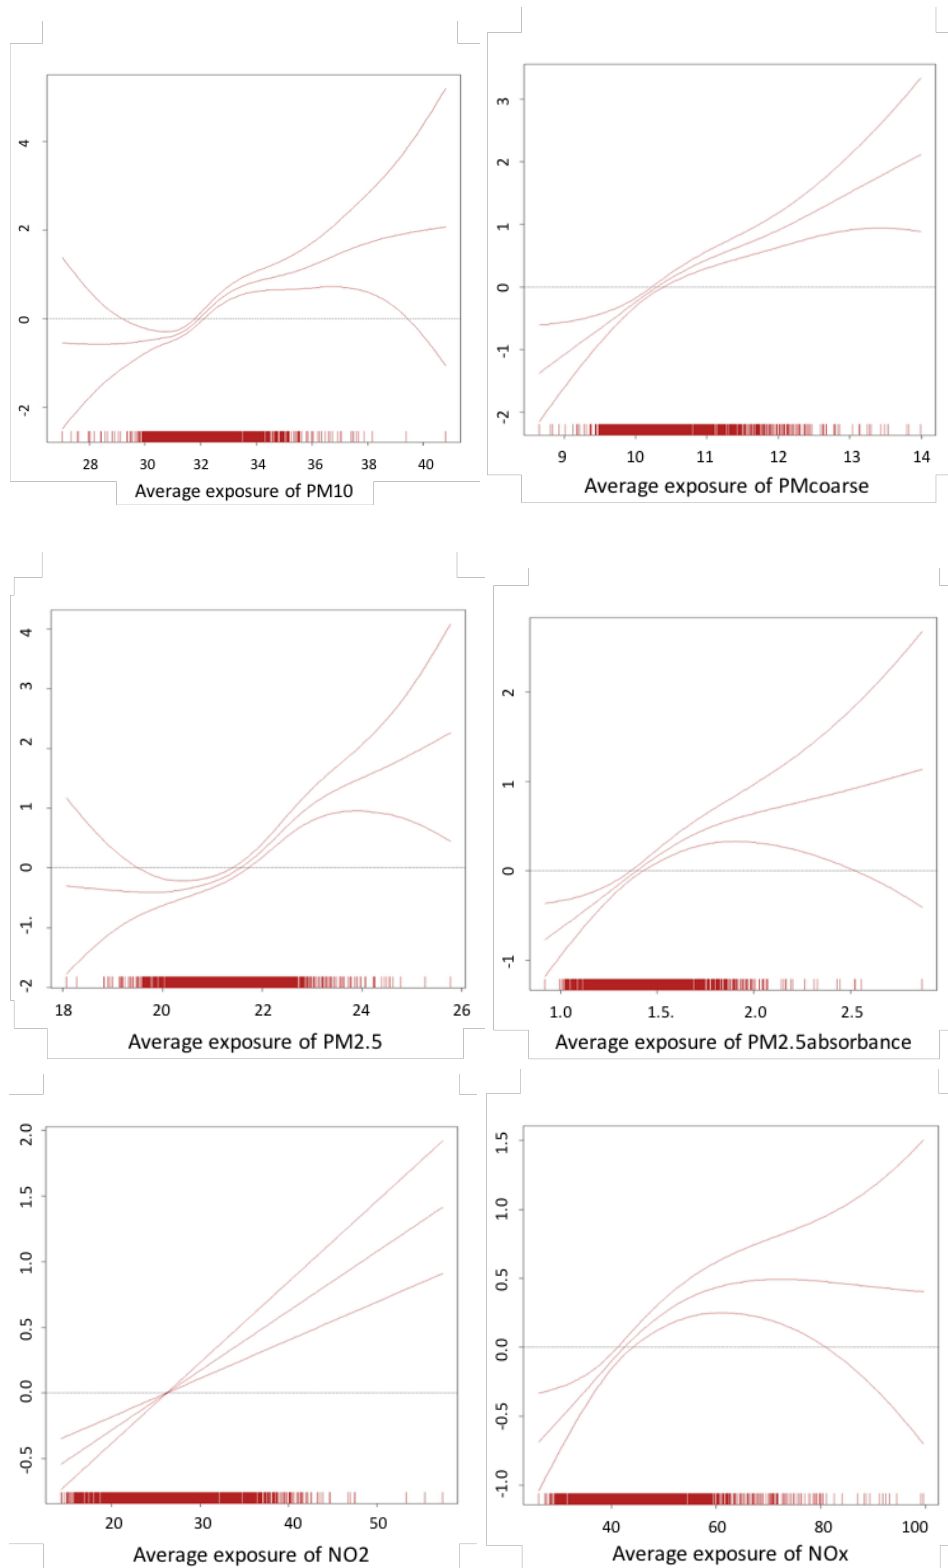

**Figure S2.** Continuous analyses using splines of each pollutant separately.
